# Supplementary material for: Clusters of Glycemic Response to Oral Glucose Tolerance Tests Explain Multivariate Metabolic and Anthropometric Outcomes of Bariatric Surgery in Obese Patients
Source: PubMed Central journal article supplement (PMC6723855; doi:10.3390/jcm8081091), 2019-07-24
Supplement: jcm-08-01091-s001.pdf [file jcm-08-01091-s001.pdf]

# **SUPPLEMENTAL MATERIAL**

**Clusters of glycemic response to oral glucose tolerance tests explain multivariate metabolic and anthropometric outcomes of bariatric surgery in obese patients**

Lukasz Szczerbinski MD, PhD, Mark A. Taylor PhD, Anna Citko Msc, Maria Gorska

MD, PhD, Steen Larsen PhD, Hady Razak Hady MD, PhD, Adam Kretowski MD, PhD

Author for correspondence: Lukasz Szczerbinski

Email: [lukasz.szczerbinski@umb.edu.pl](mailto:lukasz.szczerbinski@umb.edu.pl)

**This file includes:**

Figures S1 to S3

Tables S1 to S7

| <b>parameter</b>                       | <b>model</b> | <b>AIC</b> | <b>BIC</b> | <b><math>\chi^2</math></b> | <b>p</b> |
|----------------------------------------|--------------|------------|------------|----------------------------|----------|
| Adiponectin                            | linear       | 4587       | 4628       | 7.0                        | 0.13360  |
|                                        | quadratic    | 4588       | 4642       |                            |          |
| Alanine transaminase                   | linear       | 5449       | 5502       | 12.8                       | 0.01246  |
|                                        | quadratic    | 5445       | 5515       |                            |          |
| Aspartate transaminase                 | linear       | 4617       | 4669       | 13.7                       | 0.00831  |
|                                        | quadratic    | 4611       | 4681       |                            |          |
| BMI                                    | linear       | 3396       | 3449       | 361.1                      | 0.00000  |
|                                        | quadratic    | 3043       | 3113       |                            |          |
| C Reactive Protein                     | linear       | 3705       | 3758       | 12.4                       | 0.01483  |
|                                        | quadratic    | 3701       | 3771       |                            |          |
| Fat mass                               | linear       | 12556      | 12608      | 186.0                      | 0.00000  |
|                                        | quadratic    | 12378      | 12448      |                            |          |
| Glucose AUC                            | linear       | 4208       | 4255       | 105.3                      | 0.00000  |
|                                        | quadratic    | 4111       | 4174       |                            |          |
| HbA1c                                  | linear       | 744        | 796        | 106.9                      | 0.00000  |
|                                        | quadratic    | 645        | 715        |                            |          |
| HDL cholesterol                        | linear       | 4435       | 4487       | 32.4                       | 0.00000  |
|                                        | quadratic    | 4410       | 4480       |                            |          |
| Hip circumference                      | linear       | 4331       | 4383       | 142.8                      | 0.00000  |
|                                        | quadratic    | 4196       | 4266       |                            |          |
| HOMA-beta                              | linear       | 6967       | 7020       | 48.0                       | 0.00000  |
|                                        | quadratic    | 6927       | 6998       |                            |          |
| HOMA-IR                                | linear       | 3362       | 3415       | 145.2                      | 0.00000  |
|                                        | quadratic    | 3225       | 3295       |                            |          |
| Insulin AUC                            | linear       | 4645       | 4692       | 18.7                       | 0.00091  |
|                                        | quadratic    | 4634       | 4697       |                            |          |
| LDL cholesterol                        | linear       | 5591       | 5643       | 1.9                        | 0.75037  |
|                                        | quadratic    | 5597       | 5667       |                            |          |
| Lean body mass                         | linear       | 11723      | 11776      | 179.3                      | 0.00000  |
|                                        | quadratic    | 11552      | 11622      |                            |          |
| Matsuda index                          | linear       | 2431       | 2481       | 35.1                       | 0.00000  |
|                                        | quadratic    | 2404       | 2470       |                            |          |
| Mean glucose concentration during OGTT | linear       | 5867       | 5920       | 94.9                       | 0.00000  |
|                                        | quadratic    | 5780       | 5850       |                            |          |
| Mean insulin concentration during OGTT | linear       | 6549       | 6602       | 31.1                       | 0.00000  |
|                                        | quadratic    | 6526       | 6596       |                            |          |
| Total body mass                        | linear       | 4691       | 4744       | 327.4                      | 0.00000  |
|                                        | quadratic    | 4372       | 4442       |                            |          |
| Total cholesterol                      | linear       | 5838       | 5891       | 15.4                       | 0.00392  |
|                                        | quadratic    | 5831       | 5901       |                            |          |
| Triglycerides                          | linear       | 6530       | 6583       | 44.8                       | 0.00000  |
|                                        | quadratic    | 6493       | 6564       |                            |          |
| Visceral adipose tissue mass           | linear       | 8496       | 8547       | 151.6                      | 0.00000  |
|                                        | quadratic    | 8352       | 8420       |                            |          |
| Waist circumference                    | linear       | 4452       | 4504       | 189.2                      | 0.00000  |

|                    |           |       |       |      |         |
|--------------------|-----------|-------|-------|------|---------|
|                    | quadratic | 4270  | 4341  |      |         |
| Waist to hip ratio | linear    | -1766 | -1714 | 16.3 | 0.00263 |
|                    | quadratic | -1775 | -1705 |      |         |

**Table S1.** Model selection for linear versus quadratic time series models for each parameter. AIC refers to the Akaike Information Criterion, and BIC refers to the Bayesian Information Criterion calculated for each time series model.  $\chi^2$  reports the test statistic value on the likelihood ratio test performed between the linear and quadratic models for a particular parameter, and p refers to the p-value for that test. There were 4 degrees of freedom for all tests. Significant p-values ( $p < 0.05$ ) indicates significant differences between models and lower information criteria indicate more informative models.

|                      | <b>Cluster 1</b> | <b>Cluster 2</b> | <b>Cluster 3</b> | <b>Cluster 4</b> |
|----------------------|------------------|------------------|------------------|------------------|
| <b>Non-diabetic</b>  | 2                | 9                | 2                | 0                |
| <b>IFG</b>           | 3                | 22               | 21               | 8                |
| <b>IFG + IGT</b>     | 0                | 5                | 1                | 20               |
| <b>untreated T2D</b> | 0                | 0                | 4                | 16               |
| <b>treated T2D</b>   | 0                | 0                | 2                | 19               |

**Table S2.** Two ways of classifying patients: diagnosis and OGTT cluster. Individually, OGTT cluster and diagnosis totals do not match with the intersecting totals between cluster and diagnosis because baseline diagnosis was missing from 4 of 138 analyzed patients (i.e., they underwent bariatric surgery before a definitive diabetes diagnosis could be established).

| Variable name                                  | Model | Class 1 | Class 2                | Class 3                 | Class 4                |
|------------------------------------------------|-------|---------|------------------------|-------------------------|------------------------|
| Total body mass, kg                            | 1     | NA      | 126.29 (114.04-136.73) | 130.25 (118.83-152.13)  | 129.3 (119.4-141.15)   |
|                                                | 2     | NA      | 129.89 (117.45-138.38) | 129.23 (116.01-152.84)  | 128.78 (116.76-141.53) |
| Fat mass, kg                                   | 1     | NA      | 63.17 (59.12-69.81)    | 61.81 (56.18-65.9)      | 63.34 (59.99-66.23)    |
|                                                | 2     | NA      | 65.59 (59.79-70.26)    | 60.34 (56.12-65.81)     | 62.51 (59.21-66.23)    |
| Lean body mass, kg                             | 1     | NA      | 60.05 (54.69-72.23)    | 60.28 (55.74-78.79)     | 58.44 (54.36-77.29)    |
|                                                | 2     | NA      | 58.61 (54.16-72.73)    | 59.58 (54.53-79.36)     | 58.82 (55.3-77.02)     |
| Visceral adipose tissue mass, kg               | 1     | NA      | 2.09 (2.08-4.81)       | 3.24 (2.79-4.88)        | 3.29 (2.94-5.22)       |
|                                                | 2     | NA      | 2.12 (1.93-4.75)       | 3.22 (2.76-4.91)        | 3.31 (2.96-5.21)       |
| BMI, kg/m <sup>2</sup>                         | 1     | NA      | 44.48 (43.82-47.34)    | 43.67 (42.69-47.87)     | 45.35 (44.6-46.69)     |
|                                                | 2     | NA      | 44.48 (43.82-47.28)    | 44.54 (42.75-47.53)     | 45.15 (44.42-46.44)    |
| Fasting glucose, mmol/L                        | 1     | NA      | 5.88 (5.74-5.94)       | 6.36 (6.14-6.68)        | 7.04 (6.74-7.26)       |
|                                                | 3     | NA      | 5.79 (5.73-5.93)       | 6.34 (6.13-6.52)        | 7.09 (6.79-7.27)       |
| Fasting insulin, pmol/L                        | 1     | NA      | 130.44 (115.73-156.70) | 185.9 (170.40-312.04)   | 236.05 (168.89-357.38) |
|                                                | 3     | NA      | 137.18 (119.60-171.48) | 197.74 (157.85-290.30)  | 258.94 (184.82-375.75) |
| HbA1c, %                                       | 1     | NA      | 5.50 (5.43-5.54)       | 5.80 (5.71-5.90)        | 6.15 (6.10-6.20)       |
|                                                | 3     | NA      | 5.50 (5.47-5.51)       | 5.87 (5.75-6.00)        | 6.20 (6.03-6.36)       |
| HbA1c, mmol/mol                                | 1     | NA      | 37 (36-37)             | 40 (39-41)              | 44 (43-44)             |
|                                                | 3     | NA      | 37 (36-37)             | 41 (39-42)              | 44 (42-46)             |
| HOMA-beta                                      | 1     | NA      | 184.15 (155.14-241.11) | 195.40 (161.77-301.94)  | 190.57 (133.53-251.61) |
|                                                | 3     | NA      | 177.93 (135.89-236.46) | 236.20 (157.01-311.66)  | 183.68 (137.55-238.32) |
| HOMA-IR                                        | 1     | NA      | 4.83 (4.61-5.60)       | 7.14 (6.07-10.90)       | 11.32 (8.61-14.68)     |
|                                                | 3     | NA      | 4.64 (4.25-5.87)       | 6.78 (5.61-10.98)       | 11.41 (8.85-14.44)     |
| Matsuda index                                  | 1     | NA      | 2.13 (1.87-2.29)       | 1.55 (0.98-1.55)        | 1.07 (0.76-1.25)       |
|                                                | 3     | NA      | 2.22 (1.78-2.48)       | 1.50 (1.00-1.59)        | 0.97 (0.72-1.23)       |
| Glucose AUC                                    | 1     | NA      | 289.02 (280.56-293.60) | 353.82 (333.87-359.72)  | 425 (399.56-439.44)    |
|                                                | 3     | NA      | 288.25 (281.76-292.21) | 349.04 (340.08-363.67)  | 422.88 (390.57-440.9)  |
| Insulin AUC                                    | 1     | NA      | 201.24 (185.52-229.36) | 230.70 (215.44-365.46)  | 249.90 (235.00-273.94) |
|                                                | 3     | NA      | 193.72 (168.78-240.87) | 253.16 (191.81-385.79)  | 273.54 (233.49-303.45) |
| Mean insulin concentration during OGTT, pmol/L | 1     | NA      | 612.52 (551.25-722.09) | 630.82 (615.47-1144.69) | 779.85 (726.46-873.62) |
|                                                | 3     | NA      | 637.57 (544.43-714.91) | 740.89 (572.7-1149.14)  | 825.91 (730.27-929.44) |
| Mean glucose concentration during OGTT, mmol/L | 1     | NA      | 7.57 (7.39-7.72)       | 9.01 (8.53-9.24)        | 10.78 (10.14-11.27)    |
|                                                | 3     | NA      | 7.59 (7.39-7.89)       | 8.98 (8.68-9.29)        | 10.79 (10-11.27)       |
| Total cholesterol, mmol/L                      | 1     | NA      | 5.08 (4.37-5.27)       | 5.16 (5.08-5.26)        | 4.60 (4.53-5.00)       |
|                                                | 3     | NA      | 4.92 (4.43-5.61)       | 5.32 (4.76-5.81)        | 4.87 (4.45-5.28)       |
| Triglycerides, mmol/L                          | 1     | NA      | 1.45 (1.19-1.58)       | 1.54 (1.41-1.83)        | 1.60 (1.55-1.69)       |
|                                                | 3     | NA      | 1.35 (1.16-1.50)       | 1.69 (1.44-1.86)        | 1.71 (1.51-1.84)       |
| HDL-cholesterol, mmol/L                        | 1     | NA      | 1.37 (0.93-1.37)       | 1.16 (1.01-1.25)        | 1.13 (1.02-1.20)       |
|                                                | 3     | NA      | 1.29 (1.09-1.42)       | 1.12 (1.00-1.33)        | 1.12 (1.03-1.18)       |

|                                         |   |    |                     |                     |                     |
|-----------------------------------------|---|----|---------------------|---------------------|---------------------|
| LDL-cholesterol,<br>mmol/L              | 1 | NA | 3.15 (2.79-3.35)    | 3.55 (3.43-3.75)    | 2.97 (2.93-3.35)    |
|                                         | 3 | NA | 3.17 (3.03-3.43)    | 3.23 (2.84-3.72)    | 2.93 (2.77-3.43)    |
| Aspartate<br>transaminase, ukat/L       | 1 | NA | 0.31 (0.30-0.44)    | 0.35 (0.33-0.36)    | 0.39 (0.32-0.50)    |
|                                         | 3 | NA | 0.31 (0.29-0.42)    | 0.36 (0.34-0.37)    | 0.42 (0.36-0.50)    |
| Alanine<br>transaminase, ukat/L         | 1 | NA | 0.41 (0.33-0.70)    | 0.45 (0.38-0.64)    | 0.58 (0.42-0.91)    |
|                                         | 3 | NA | 0.39 (0.36-0.71)    | 0.48 (0.41-0.59)    | 0.64 (0.49-0.80)    |
| C Reactive Protein,<br>nmol/L           | 1 | NA | 57.80 (47.33-70.47) | 50.76 (46.19-63.42) | 61.99 (57.33-69.61) |
|                                         | 3 | NA | 52.57 (35.23-75.23) | 50.38 (39.42-55.14) | 55.99 (45.52-72.85) |
| Physical activity,<br>METs-minutes/week | 1 | NA | 6233 (5624-6484)    | 5388 (5050-6664)    | 5214 (3131-6851)    |
|                                         | 3 | NA | 5514 (3550-7669)    | 4854 (3580-6491)    | 4698 (2985-7218)    |
| Daily kcal intake,<br>kcal/day          | 1 | NA | 1714 (1702-2093)    | 1640 (1472-2210)    | 1724 (1493-1966)    |
|                                         | 2 | NA | 1755 (1718-2145)    | 1679 (1412-2108)    | 1724 (1517-1966)    |

**Table S3.** Quantile regression-estimated medians (IQRs) at baseline divided by OGTT cluster. Model 1 controlled for age and sex; model 2 controlled for age, sex, and smoking status; and model 3 for age, sex, smoking status, and baseline BMI. NA indicated unstable model estimates in cluster 1 because of insufficient sample size (n = 6).

| <b>parameter</b>                | <b>time</b> | <b>mean</b> | <b>SE</b> | <b>df</b> | <b>LCL</b> | <b>UCL</b> | <b>CLD</b> |
|---------------------------------|-------------|-------------|-----------|-----------|------------|------------|------------|
| <b>Waist circumference (cm)</b> | baseline    | 136.83      | 1.32      | 137       | 134.23     | 139.44     | 5          |
|                                 | 1 mo        | 126.64      | 1.32      | 137       | 124.03     | 129.24     | 4          |
|                                 | 3 mo        | 119.2       | 1.32      | 137       | 116.58     | 121.82     | 3          |
|                                 | 6 mo        | 110.56      | 1.34      | 137       | 107.91     | 113.21     | 2          |
|                                 | 12 mo       | 105.16      | 1.41      | 137       | 102.39     | 107.94     | 1          |
| <b>Hip circumference (cm)</b>   | baseline    | 135.24      | 1.2       | 137       | 132.86     | 137.62     | 5          |
|                                 | 1 mo        | 128.07      | 1.2       | 137       | 125.69     | 130.45     | 4          |
|                                 | 3 mo        | 121.5       | 1.21      | 137       | 119.1      | 123.89     | 3          |
|                                 | 6 mo        | 115.38      | 1.23      | 137       | 112.96     | 117.81     | 2          |
|                                 | 12 mo       | 111.52      | 1.29      | 137       | 108.97     | 114.07     | 1          |
| <b>Waist to hip ratio</b>       | baseline    | 1.02        | 0.01      | 137       | 1          | 1.03       | 3          |
|                                 | 1 mo        | 0.99        | 0.01      | 137       | 0.98       | 1.01       | 2          |
|                                 | 3 mo        | 0.98        | 0.01      | 137       | 0.97       | 1          | 2          |
|                                 | 6 mo        | 0.96        | 0.01      | 137       | 0.94       | 0.97       | 1          |
|                                 | 12 mo       | 0.94        | 0.01      | 137       | 0.93       | 0.96       | 1          |
| <b>Total body mass (kg)</b>     | baseline    | 135.74      | 2.02      | 136       | 131.74     | 139.73     | 5          |
|                                 | 1 mo        | 122.01      | 2.02      | 136       | 118.02     | 126.01     | 4          |
|                                 | 3 mo        | 111.5       | 2.02      | 136       | 107.5      | 115.5      | 3          |
|                                 | 6 mo        | 103.41      | 2.03      | 136       | 99.39      | 107.44     | 2          |
|                                 | 12 mo       | 98.93       | 2.08      | 136       | 94.82      | 103.04     | 1          |
| <b>Fat mass (kg)</b>            | baseline    | 65.81       | 1.32      | 136       | 63.20      | 68.42      | 5          |
|                                 | 1 mo        | 58.36       | 1.32      | 136       | 55.75      | 60.96      | 4          |
|                                 | 3 mo        | 48.38       | 1.32      | 136       | 45.76      | 50.99      | 3          |
|                                 | 6 mo        | 41.34       | 1.34      | 136       | 38.69      | 43.99      | 2          |
|                                 | 12 mo       | 36.26       | 1.40      | 136       | 33.49      | 39.03      | 1          |
| <b>Lean body mass (kg)</b>      | baseline    | 66.80       | 1.06      | 136       | 64.70      | 68.90      | 3          |
|                                 | 1 mo        | 60.45       | 1.06      | 136       | 58.36      | 62.55      | 2          |
|                                 | 3 mo        | 60.02       | 1.06      | 136       | 57.92      | 62.12      | 12         |
|                                 | 6 mo        | 59.73       | 1.07      | 136       | 57.62      | 61.84      | 12         |
|                                 | 12 mo       | 59.47       | 1.08      | 136       | 57.33      | 61.60      | 1          |
| <b>BMI (kg/m<sup>2</sup>)</b>   | baseline    | 46.3        | 0.54      | 137       | 45.23      | 47.37      | 5          |
|                                 | 1 mo        | 41.65       | 0.54      | 137       | 40.58      | 42.72      | 4          |

|                                                        |          |        |       |     |        |        |    |
|--------------------------------------------------------|----------|--------|-------|-----|--------|--------|----|
|                                                        | 3 mo     | 38.1   | 0.54  | 137 | 37.03  | 39.18  | 3  |
|                                                        | 6 mo     | 35.29  | 0.55  | 137 | 34.21  | 36.37  | 2  |
|                                                        | 12 mo    | 33.73  | 0.56  | 137 | 32.62  | 34.85  | 1  |
| <b>Physical activity (METs-minutes/week)</b>           | baseline | 9047   | 839   | 137 | 7389   | 10706  | 12 |
|                                                        | 1 mo     | 6675   | 851   | 137 | 4991   | 8358   | 1  |
|                                                        | 3 mo     | 11177  | 857   | 137 | 9483   | 12871  | 23 |
|                                                        | 6 mo     | 10835  | 904   | 137 | 9046   | 12623  | 23 |
|                                                        | 12 mo    | 13791  | 1052  | 137 | 11711  | 15871  | 3  |
| <b>HbA1c (%)</b>                                       | baseline | 5.95   | 0.05  | 137 | 5.86   | 6.05   | 3  |
|                                                        | 1 mo     | 5.55   | 0.05  | 137 | 5.46   | 5.64   | 2  |
|                                                        | 3 mo     | 5.38   | 0.05  | 137 | 5.28   | 5.47   | 1  |
|                                                        | 6 mo     | 5.36   | 0.05  | 137 | 5.27   | 5.46   | 1  |
|                                                        | 12 mo    | 5.27   | 0.05  | 137 | 5.16   | 5.38   | 1  |
| <b>HOMA-beta</b>                                       | baseline | 230.53 | 9.05  | 137 | 212.64 | 248.43 | 4  |
|                                                        | 1 mo     | 183.2  | 9.08  | 137 | 165.24 | 201.15 | 3  |
|                                                        | 3 mo     | 157.43 | 9.16  | 137 | 139.31 | 175.56 | 2  |
|                                                        | 6 mo     | 138.99 | 9.46  | 137 | 120.28 | 157.7  | 12 |
|                                                        | 12 mo    | 129.16 | 10.56 | 137 | 108.28 | 150.03 | 1  |
| <b>HOMA-IR</b>                                         | baseline | 10.32  | 0.36  | 137 | 9.62   | 11.03  | 3  |
|                                                        | 1 mo     | 6.06   | 0.36  | 137 | 5.36   | 6.77   | 2  |
|                                                        | 3 mo     | 4.29   | 0.36  | 137 | 3.58   | 5.01   | 1  |
|                                                        | 6 mo     | 3.47   | 0.38  | 137 | 2.72   | 4.22   | 1  |
|                                                        | 12 mo    | 3.3    | 0.44  | 137 | 2.43   | 4.17   | 1  |
| <b>Mean insulin concentration during OGTT (pmol/L)</b> | baseline | 866.96 | 30.85 | 137 | 806.04 | 927.94 | 4  |
|                                                        | 1 mo     | 155.48 | 31.00 | 137 | 94.21  | 216.69 | 1  |
|                                                        | 3 mo     | 554.56 | 31.35 | 137 | 492.56 | 616.55 | 3  |
|                                                        | 6 mo     | 489.55 | 32.79 | 137 | 424.69 | 554.48 | 23 |
|                                                        | 12 mo    | 416.44 | 37.81 | 137 | 341.67 | 491.20 | 2  |
| <b>Mean glucose concentration during OGTT (mmol/l)</b> | baseline | 9.47   | 0.14  | 137 | 9.19   | 9.74   | 4  |
|                                                        | 1 mo     | 6.05   | 0.14  | 137 | 5.78   | 6.32   | 1  |
|                                                        | 3 mo     | 7.17   | 0.14  | 137 | 6.90   | 7.45   | 3  |
|                                                        | 6 mo     | 6.98   | 0.15  | 137 | 6.69   | 7.26   | 23 |
|                                                        | 12 mo    | 6.68   | 0.17  | 137 | 6.35   | 7.01   | 2  |
| <b>Matsuda index</b>                                   | baseline | 1.48   | 0.31  | 137 | 0.87   | 2.1    | 1  |



|                                        |          |        |       |     |        |        |    |
|----------------------------------------|----------|--------|-------|-----|--------|--------|----|
|                                        | 3 mo     | 4.18   | 0.32  | 137 | 3.55   | 4.81   | 2  |
|                                        | 6 mo     | 5.01   | 0.33  | 137 | 4.35   | 5.67   | 23 |
|                                        | 12 mo    | 5.69   | 0.39  | 137 | 4.92   | 6.45   | 3  |
| <b>Glucose AUC</b>                     | baseline | 364.41 | 6.37  | 137 | 351.81 | 377.01 | 2  |
|                                        | 3 mo     | 288.05 | 7     | 137 | 274.21 | 301.9  | 1  |
|                                        | 6 mo     | 280.27 | 7.29  | 137 | 265.86 | 294.68 | 1  |
|                                        | 12 mo    | 278.47 | 8.57  | 137 | 261.52 | 295.43 | 1  |
| <b>Insulin AUC</b>                     | baseline | 280.05 | 10.99 | 136 | 258.32 | 301.78 | 2  |
|                                        | 3 mo     | 217    | 12.08 | 136 | 193.1  | 240.9  | 1  |
|                                        | 6 mo     | 201.96 | 12.67 | 136 | 176.89 | 227.02 | 1  |
|                                        | 12 mo    | 186.8  | 14.87 | 136 | 157.39 | 216.21 | 1  |
| <b>Total cholesterol (mmol/l)</b>      | baseline | 5.01   | 0.08  | 137 | 4.85   | 5.17   | 3  |
|                                        | 1 mo     | 4.45   | 0.08  | 137 | 4.29   | 4.61   | 1  |
|                                        | 3 mo     | 4.63   | 0.08  | 137 | 4.47   | 4.80   | 12 |
|                                        | 6 mo     | 4.81   | 0.09  | 137 | 4.64   | 4.98   | 23 |
|                                        | 12 mo    | 4.82   | 0.10  | 137 | 4.64   | 5.01   | 23 |
| <b>Triglycerides (mmol/l)</b>          | baseline | 1.80   | 0.06  | 137 | 1.68   | 1.91   | 3  |
|                                        | 1 mo     | 1.52   | 0.06  | 137 | 1.41   | 1.64   | 2  |
|                                        | 3 mo     | 1.23   | 0.06  | 137 | 1.12   | 1.35   | 1  |
|                                        | 6 mo     | 1.19   | 0.06  | 137 | 1.07   | 1.31   | 1  |
|                                        | 12 mo    | 1.14   | 0.07  | 137 | 1.00   | 1.28   | 1  |
| <b>HDL cholesterol (mmol/l)</b>        | baseline | 1.19   | 0.03  | 136 | 1.14   | 1.25   | 2  |
|                                        | 1 mo     | 0.98   | 0.03  | 136 | 0.93   | 1.03   | 1  |
|                                        | 3 mo     | 1.16   | 0.03  | 136 | 1.11   | 1.21   | 2  |
|                                        | 6 mo     | 1.33   | 0.03  | 136 | 1.28   | 1.39   | 3  |
|                                        | 12 mo    | 1.52   | 0.03  | 136 | 1.47   | 1.58   | 4  |
| <b>LDL cholesterol (mmol/l)</b>        | baseline | 3.15   | 0.07  | 137 | 3.02   | 3.29   | 2  |
|                                        | 1 mo     | 2.84   | 0.07  | 137 | 2.70   | 2.97   | 1  |
|                                        | 3 mo     | 3.04   | 0.07  | 137 | 2.90   | 3.17   | 2  |
|                                        | 6 mo     | 3.11   | 0.07  | 137 | 2.97   | 3.25   | 2  |
|                                        | 12 mo    | 3.08   | 0.08  | 137 | 2.92   | 3.24   | 2  |
| <b>Aspartate transaminase (ukat/l)</b> | baseline | 0.47   | 0.02  | 137 | 0.43   | 0.50   | 2  |
|                                        | 1 mo     | 0.48   | 0.02  | 137 | 0.45   | 0.52   | 2  |
|                                        | 3 mo     | 0.37   | 0.02  | 137 | 0.34   | 0.41   | 1  |

|                                              |          |          |       |      |       |       |       |
|----------------------------------------------|----------|----------|-------|------|-------|-------|-------|
|                                              | 6 mo     | 0.33     | 0.02  | 137  | 0.29  | 0.37  | 1     |
|                                              | 12 mo    | 0.33     | 0.02  | 137  | 0.29  | 0.37  | 1     |
| <b>Alanine<br/>transaminase<br/>(ukat/l)</b> | baseline | 0.62     | 0.03  | 137  | 0.56  | 0.68  | 3     |
|                                              | 1 mo     | 0.71     | 0.03  | 137  | 0.65  | 0.78  | 3     |
|                                              | 3 mo     | 0.45     | 0.03  | 137  | 0.39  | 0.52  | 2     |
|                                              | 6 mo     | 0.34     | 0.04  | 137  | 0.27  | 0.41  | 1     |
|                                              | 12 mo    | 0.31     | 0.04  | 137  | 0.23  | 0.40  | 1     |
|                                              |          | baseline | 64.29 | 4.57 | 137   | 55.33 | 73.24 |
| <b>C-Reactive<br/>Protein<br/>(nmol/l)</b>   | 1 mo     | 46.19    | 4.48  | 137  | 37.24 | 55.05 | 2     |
|                                              | 3 mo     | 42.10    | 4.57  | 137  | 33.05 | 51.14 | 12    |
|                                              | 6 mo     | 30.00    | 4.86  | 137  | 20.38 | 39.52 | 1     |
|                                              | 12 mo    | 29.71    | 5.71  | 137  | 18.38 | 40.95 | 12    |

**Table S4.** Generalized linear mixed models comparing time points for the entire patient cohort within each parameter controlling for age, sex, and smoking status. Mean refers to model-adjusted mean; SE for standard error; df for degrees of freedom; LCL for the lower 95% confidence limit; UCL for the upper 95% confidence limit; CLD for compact letter display. Times with different CLDs within a particular parameter indicates that those times are significantly different from each other.

| <b>variable</b>                        | <b>category</b>     | <b>% change</b> |
|----------------------------------------|---------------------|-----------------|
| Waist circumference                    | Anthropometric      | 23.1            |
| Hip circumference                      | Anthropometric      | 17.5            |
| Waist to hip ratio                     | Anthropometric      | 7.2             |
| Total body mass                        | Anthropometric      | 27.1            |
| Fat mass                               | Anthropometric      | 44.9            |
| Lean body mass                         | Anthropometric      | 11.0            |
| Visceral adipose tissue mass           | Anthropometric      | 56.0            |
| BMI                                    | Anthropometric      | 27.2            |
| Physical activity                      | exercise            | 52.4            |
| HbA1c                                  | Glucose homeostasis | 11.4            |
| HOMA-beta                              | Glucose homeostasis | 44.0            |
| HOMA-IR                                | Glucose homeostasis | 68.0            |
| Mean insulin concentration during OGTT | Glucose homeostasis | 52.0            |
| Mean glucose concentration during OGTT | Glucose homeostasis | 29.4            |
| Matsuda index                          | Glucose homeostasis | 283.4           |
| Glucose AUC                            | Glucose homeostasis | 23.6            |
| Insulin AUC                            | Glucose homeostasis | 33.3            |
| Total cholesterol                      | General metabolic   | 3.7             |
| Triglycerides                          | General metabolic   | 36.4            |
| HDL cholesterol                        | General metabolic   | 27.5            |
| LDL cholesterol                        | General metabolic   | 2.3             |
| Aspartate transaminase                 | General metabolic   | 29.0            |
| Alanine transaminase                   | General metabolic   | 49.3            |
| C Reactive Protein                     | General metabolic   | 53.8            |

**Table S5.** Percent change (% change) from baseline to 12-month follow-up calculated from LS means ( $[(\text{final LS mean} - \text{baseline LS mean}) / \text{baseline LS mean}] \times 100$ ) from time series models adjusting for age, sex, and smoking status.

| <b>name</b>         | <b>time</b> | <b>OGTT</b> | <b>mean</b> | <b>SE</b> | <b>df</b> | <b>LCL</b> | <b>UCL</b> | <b>CLD</b> |
|---------------------|-------------|-------------|-------------|-----------|-----------|------------|------------|------------|
| Glycated hemoglobin | baseline    | 1           | 5.15        | 0.20      | 137       | 4.76       | 5.54       | 1234       |
|                     | 1 mo        | 1           | 4.88        | 0.20      | 137       | 4.49       | 5.28       | 12         |
|                     | 3 mo        | 1           | 4.95        | 0.20      | 137       | 4.56       | 5.34       | 12         |
|                     | 6 mo        | 1           | 5.13        | 0.20      | 137       | 4.74       | 5.53       | 1234       |
|                     | 12 mo       | 1           | 4.93        | 0.25      | 137       | 4.44       | 5.41       | 123        |
|                     | baseline    | 2           | 5.47        | 0.08      | 134       | 5.31       | 5.63       | 234        |
|                     | 1 mo        | 2           | 5.19        | 0.08      | 134       | 5.03       | 5.35       | 1          |
|                     | 3 mo        | 2           | 5.15        | 0.08      | 134       | 4.99       | 5.31       | 1          |
|                     | 6 mo        | 2           | 5.17        | 0.09      | 134       | 5.00       | 5.34       | 1          |
|                     | 12 mo       | 2           | 5.09        | 0.10      | 134       | 4.89       | 5.28       | 1          |
|                     | baseline    | 3           | 5.89        | 0.09      | 134       | 5.72       | 6.06       | 4          |
|                     | 1 mo        | 3           | 5.53        | 0.09      | 134       | 5.36       | 5.70       | 123        |
|                     | 3 mo        | 3           | 5.49        | 0.09      | 134       | 5.32       | 5.67       | 123        |
|                     | 6 mo        | 3           | 5.46        | 0.09      | 134       | 5.27       | 5.65       | 123        |
|                     | 12 mo       | 3           | 5.27        | 0.11      | 134       | 5.06       | 5.48       | 12         |
|                     | baseline    | 4           | 6.35        | 0.06      | 134       | 6.23       | 6.47       | 5          |
|                     | 1 mo        | 4           | 5.83        | 0.06      | 134       | 5.71       | 5.95       | 34         |
|                     | 3 mo        | 4           | 5.50        | 0.06      | 134       | 5.37       | 5.62       | 12         |
|                     | 6 mo        | 4           | 5.46        | 0.06      | 134       | 5.33       | 5.58       | 12         |
|                     | 12 mo       | 4           | 5.43        | 0.07      | 134       | 5.29       | 5.56       | 12         |
| HOMA-beta           | baseline    | 1           | 406.33      | 42.78     | 137       | 321.74     | 490.91     | 6          |
|                     | 1 mo        | 1           | 231.45      | 44.80     | 137       | 142.87     | 320.04     | 12345      |
|                     | 3 mo        | 1           | 178.71      | 42.78     | 137       | 94.13      | 263.30     | 12345      |
|                     | 6 mo        | 1           | 188.71      | 42.78     | 137       | 104.12     | 273.30     | 12345      |
|                     | 12 mo       | 1           | 146.30      | 47.54     | 137       | 52.30      | 240.31     | 12345      |
|                     | baseline    | 2           | 200.86      | 17.23     | 134       | 166.80     | 234.93     | 2345       |
|                     | 1 mo        | 2           | 181.24      | 17.23     | 134       | 147.17     | 215.31     | 12345      |
|                     | 3 mo        | 2           | 146.80      | 17.46     | 134       | 112.28     | 181.33     | 124        |
|                     | 6 mo        | 2           | 123.84      | 18.33     | 134       | 87.58      | 160.09     | 1          |
|                     | 12 mo       | 2           | 125.46      | 20.69     | 134       | 84.53      | 166.39     | 1          |
|                     | baseline    | 3           | 239.00      | 18.82     | 134       | 201.78     | 276.22     | 456        |
|                     | 1 mo        | 3           | 179.26      | 18.96     | 134       | 141.76     | 216.77     | 123        |
|                     | 3 mo        | 3           | 145.52      | 19.47     | 134       | 107.02     | 184.03     | 123        |
|                     | 6 mo        | 3           | 122.46      | 20.10     | 134       | 82.71      | 162.21     | 12         |
|                     | 12 mo       | 3           | 110.97      | 23.06     | 134       | 65.35      | 156.58     | 12         |
|                     | baseline    | 4           | 226.97      | 13.15     | 134       | 200.97     | 252.97     | 35         |
|                     | 1 mo        | 4           | 181.36      | 13.15     | 134       | 155.36     | 207.36     | 124        |
|                     | 3 mo        | 4           | 167.11      | 13.19     | 134       | 141.02     | 193.21     | 124        |
|                     | 6 mo        | 4           | 150.27      | 13.53     | 134       | 123.50     | 177.03     | 12         |
|                     | 12 mo       | 4           | 138.01      | 14.81     | 134       | 108.71     | 167.31     | 12         |
| HOMA-IR             | baseline    | 1           | 9.42        | 1.59      | 137       | 6.27       | 12.57      | 4567       |
|                     | 1 mo        | 1           | 5.29        | 1.59      | 137       | 2.14       | 8.44       | 123456     |
|                     | 3 mo        | 1           | 3.56        | 1.59      | 137       | 0.41       | 6.70       | 123456     |
|                     | 6 mo        | 1           | 3.71        | 1.59      | 137       | 0.56       | 6.86       | 123456     |
|                     | 12 mo       | 1           | 2.40        | 1.85      | 137       | -1.25      | 6.06       | 123        |
|                     | baseline    | 2           | 5.87        | 0.64      | 134       | 4.60       | 7.14       | 2345       |
|                     | 1 mo        | 2           | 4.86        | 0.64      | 134       | 3.59       | 6.13       | 12345      |
|                     | 3 mo        | 2           | 3.15        | 0.65      | 134       | 1.85       | 4.44       | 1          |
|                     | 6 mo        | 2           | 2.78        | 0.70      | 134       | 1.39       | 4.16       | 1          |
|                     | 12 mo       | 2           | 2.89        | 0.83      | 134       | 1.25       | 4.53       | 12         |

|                   |               |          |        |        |       |        |        |          |                 |
|-------------------|---------------|----------|--------|--------|-------|--------|--------|----------|-----------------|
|                   | baseline      | 3        | 9.68   | 0.70   | 134   | 8.29   | 11.06  | 6        |                 |
|                   | 1 mo          | 3        | 6.03   | 0.71   | 134   | 4.63   | 7.43   | 12345    |                 |
|                   | 3 mo          | 3        | 4.01   | 0.74   | 134   | 2.55   | 5.47   | 12345    |                 |
|                   | 6 mo          | 3        | 3.30   | 0.77   | 134   | 1.78   | 4.82   | 124      |                 |
|                   | 12 mo         | 3        | 3.00   | 0.93   | 134   | 1.16   | 4.83   | 124      |                 |
|                   | baseline      | 4        | 13.34  | 0.49   | 134   | 12.37  | 14.31  | 7        |                 |
|                   | 1 mo          | 4        | 6.85   | 0.49   | 134   | 5.88   | 7.82   | 356      |                 |
|                   | 3 mo          | 4        | 5.16   | 0.49   | 134   | 4.19   | 6.14   | 12345    |                 |
|                   | 6 mo          | 4        | 3.97   | 0.51   | 134   | 2.96   | 4.98   | 124      |                 |
|                   | 12 mo         | 4        | 3.86   | 0.58   | 134   | 2.71   | 5.01   | 124      |                 |
| Total cholesterol | baseline      | 1        | 180.83 | 15.02  | 137   | 151.13 | 210.54 | 12345    |                 |
|                   | 1 mo          | 1        | 173.83 | 15.02  | 137   | 144.13 | 203.54 | 12345    |                 |
|                   | 3 mo          | 1        | 171.17 | 15.02  | 137   | 141.46 | 200.87 | 12345    |                 |
|                   | 6 mo          | 1        | 180.17 | 15.02  | 137   | 150.46 | 209.87 | 12345    |                 |
|                   | 12 mo         | 1        | 176.53 | 16.73  | 137   | 143.45 | 209.61 | 12345    |                 |
|                   | baseline      | 2        | 193.24 | 6.05   | 134   | 181.28 | 205.21 | 345      |                 |
|                   | 1 mo          | 2        | 163.00 | 6.05   | 134   | 151.04 | 174.96 | 12       |                 |
|                   | 3 mo          | 2        | 174.62 | 6.13   | 134   | 162.49 | 186.75 | 1234     |                 |
|                   | 6 mo          | 2        | 182.02 | 6.45   | 134   | 169.26 | 194.79 | 12345    |                 |
|                   | 12 mo         | 2        | 183.04 | 7.31   | 134   | 168.57 | 197.50 | 12345    |                 |
|                   | baseline      | 3        | 208.94 | 6.61   | 134   | 195.87 | 222.01 | 5        |                 |
|                   | 1 mo          | 3        | 188.85 | 6.66   | 134   | 175.68 | 202.03 | 12345    |                 |
|                   | 3 mo          | 3        | 194.75 | 6.72   | 134   | 181.46 | 208.04 | 12345    |                 |
|                   | 6 mo          | 3        | 199.92 | 7.07   | 134   | 185.92 | 213.91 | 45       |                 |
|                   | 12 mo         | 3        | 196.00 | 7.98   | 134   | 180.22 | 211.79 | 12345    |                 |
|                   | baseline      | 4        | 187.22 | 4.60   | 134   | 178.12 | 196.31 | 245      |                 |
|                   | 1 mo          | 4        | 168.62 | 4.62   | 134   | 159.49 | 177.75 | 13       |                 |
|                   | 3 mo          | 4        | 174.42 | 4.63   | 134   | 165.26 | 183.59 | 1234     |                 |
|                   | 6 mo          | 4        | 181.37 | 4.74   | 134   | 172.00 | 190.74 | 12345    |                 |
|                   | 12 mo         | 4        | 183.98 | 5.19   | 134   | 173.72 | 194.24 | 12345    |                 |
|                   | Triglycerides | baseline | 1      | 97.33  | 23.85 | 137    | 50.16  | 144.50   | 12345678        |
|                   |               | 1 mo     | 1      | 119.50 | 23.85 | 137    | 72.33  | 166.67   | 12345678        |
|                   |               | 3 mo     | 1      | 108.00 | 23.85 | 137    | 60.83  | 155.17   | 12345678        |
|                   |               | 6 mo     | 1      | 100.67 | 23.85 | 137    | 53.50  | 147.84   | 12345678        |
| 12 mo             |               | 1        | 111.65 | 27.66  | 137   | 56.95  | 166.36 | 12345678 |                 |
| baseline          |               | 2        | 133.27 | 9.61   | 134   | 114.27 | 152.27 | 345678   |                 |
| 1 mo              |               | 2        | 111.30 | 9.61   | 134   | 92.30  | 130.30 | 12345    |                 |
| 3 mo              |               | 2        | 90.23  | 9.80   | 134   | 70.85  | 109.61 | 1        |                 |
| 6 mo              |               | 2        | 91.67  | 10.50  | 134   | 70.89  | 112.45 | 12       |                 |
| 12 mo             |               | 2        | 84.07  | 12.38  | 134   | 59.58  | 108.55 | 1        |                 |
| baseline          |               | 3        | 175.58 | 10.49  | 134   | 154.82 | 196.34 | 78       |                 |
| 1 mo              |               | 3        | 159.77 | 10.61  | 134   | 138.78 | 180.77 | 5678     |                 |
| 3 mo              |               | 3        | 131.10 | 10.75  | 134   | 109.85 | 152.36 | 123456   |                 |
| 6 mo              |               | 3        | 123.66 | 11.53  | 134   | 100.85 | 146.47 | 123456   |                 |
| 12 mo             |               | 3        | 106.70 | 13.50  | 134   | 79.99  | 133.40 | 1234     |                 |
| baseline          |               | 4        | 171.34 | 7.30   | 134   | 156.90 | 185.79 | 68       |                 |
| 1 mo              |               | 4        | 137.62 | 7.34   | 134   | 123.10 | 152.15 | 2457     |                 |
| 3 mo              |               | 4        | 109.34 | 7.38   | 134   | 94.73  | 123.94 | 1234     |                 |
| 6 mo              |               | 4        | 105.27 | 7.61   | 134   | 90.21  | 120.33 | 13       |                 |
| 12 mo             |               | 4        | 105.86 | 8.61   | 134   | 88.83  | 122.89 | 1234     |                 |
| HDL cholesterol   |               | baseline | 1      | 44.17  | 4.74  | 136    | 34.79  | 53.55    | 1234567890ABCDE |

|  |          |   |        |       |     |        |        |                  |
|--|----------|---|--------|-------|-----|--------|--------|------------------|
|  | 1 mo     | 1 | 35.50  | 4.74  | 136 | 26.12  | 44.88  | 123456           |
|  | 3 mo     | 1 | 41.67  | 4.74  | 136 | 32.29  | 51.05  | 1234567890ABCDE  |
|  | 6 mo     | 1 | 50.83  | 4.74  | 136 | 41.45  | 60.21  | 7890ABCDEF       |
|  | 12 mo    | 1 | 48.60  | 5.21  | 136 | 38.29  | 58.91  | 1234567890ABCDEF |
|  | baseline | 2 | 48.62  | 1.91  | 133 | 44.84  | 52.40  | 4560ABCDE        |
|  | 1 mo     | 2 | 39.19  | 1.91  | 133 | 35.41  | 42.97  | 123789           |
|  | 3 mo     | 2 | 46.19  | 1.93  | 133 | 42.37  | 50.02  | 4560AB           |
|  | 6 mo     | 2 | 52.26  | 2.02  | 133 | 48.26  | 56.26  | 56ABCDE          |
|  | 12 mo    | 2 | 63.35  | 2.26  | 133 | 58.88  | 67.83  | F                |
|  | baseline | 3 | 47.33  | 2.12  | 133 | 43.14  | 51.53  | 3569AB           |
|  | 1 mo     | 3 | 39.89  | 2.14  | 133 | 35.66  | 44.11  | 124780           |
|  | 3 mo     | 3 | 44.16  | 2.15  | 133 | 39.90  | 48.42  | 1234567890AB     |
|  | 6 mo     | 3 | 49.89  | 2.23  | 133 | 45.47  | 54.30  | 56ABC            |
|  | 12 mo    | 3 | 58.64  | 2.48  | 133 | 53.72  | 63.55  | DEF              |
|  | baseline | 4 | 44.30  | 1.45  | 133 | 41.42  | 47.17  | 2345890A         |
|  | 1 mo     | 4 | 36.16  | 1.46  | 133 | 33.27  | 39.06  | 17               |
|  | 3 mo     | 4 | 44.29  | 1.46  | 133 | 41.40  | 47.18  | 2345890A         |
|  | 6 mo     | 4 | 51.67  | 1.49  | 133 | 48.72  | 54.62  | 6BD              |
|  | 12 mo    | 4 | 57.56  | 1.61  | 133 | 54.36  | 60.75  | CEF              |
|  | baseline | 1 | 117.58 | 12.55 | 137 | 92.76  | 142.41 | 123              |
|  | 1 mo     | 1 | 112.90 | 12.55 | 137 | 88.08  | 137.72 | 123              |
|  | 3 mo     | 1 | 115.37 | 12.55 | 137 | 90.54  | 140.19 | 123              |
|  | 6 mo     | 1 | 114.37 | 12.55 | 137 | 89.54  | 139.19 | 123              |
|  | 12 mo    | 1 | 109.30 | 13.97 | 137 | 81.68  | 136.93 | 123              |
|  | baseline | 2 | 122.54 | 5.06  | 134 | 112.54 | 132.54 | 23               |
|  | 1 mo     | 2 | 103.48 | 5.06  | 134 | 93.48  | 113.47 | 1                |
|  | 3 mo     | 2 | 114.02 | 5.13  | 134 | 103.88 | 124.16 | 123              |
|  | 6 mo     | 2 | 118.86 | 5.39  | 134 | 108.20 | 129.53 | 123              |
|  | 12 mo    | 2 | 112.33 | 6.11  | 134 | 100.25 | 124.40 | 123              |
|  | baseline | 3 | 131.87 | 5.52  | 134 | 120.95 | 142.80 | 3                |
|  | 1 mo     | 3 | 120.78 | 5.57  | 134 | 109.77 | 131.79 | 123              |
|  | 3 mo     | 3 | 126.86 | 5.62  | 134 | 115.75 | 137.97 | 123              |
|  | 6 mo     | 3 | 131.43 | 5.91  | 134 | 119.74 | 143.12 | 123              |
|  | 12 mo    | 3 | 127.01 | 6.66  | 134 | 113.84 | 140.19 | 123              |
|  | baseline | 4 | 116.92 | 3.84  | 134 | 109.31 | 124.52 | 123              |
|  | 1 mo     | 4 | 107.29 | 3.86  | 134 | 99.66  | 114.92 | 12               |
|  | 3 mo     | 4 | 114.59 | 3.87  | 134 | 106.93 | 122.25 | 123              |
|  | 6 mo     | 4 | 116.21 | 3.96  | 134 | 108.38 | 124.04 | 123              |
|  | 12 mo    | 4 | 119.25 | 4.33  | 134 | 110.69 | 127.82 | 123              |
|  | baseline | 1 | 23.27  | 4.93  | 137 | 13.53  | 33.01  | 1234             |
|  | 1 mo     | 1 | 26.47  | 4.93  | 137 | 16.73  | 36.21  | 1234             |
|  | 3 mo     | 1 | 21.02  | 4.93  | 137 | 11.28  | 30.76  | 1234             |
|  | 6 mo     | 1 | 20.65  | 4.93  | 137 | 10.91  | 30.39  | 1234             |
|  | 12 mo    | 1 | 24.12  | 5.77  | 137 | 12.70  | 35.53  | 1234             |
|  | baseline | 2 | 28.32  | 1.98  | 134 | 24.40  | 32.24  | 234              |
|  | 1 mo     | 2 | 28.43  | 2.00  | 134 | 24.47  | 32.40  | 234              |
|  | 3 mo     | 2 | 21.99  | 2.03  | 134 | 17.99  | 26.00  | 1234             |
|  | 6 mo     | 2 | 19.57  | 2.18  | 134 | 15.25  | 23.89  | 1                |
|  | 12 mo    | 2 | 19.74  | 2.60  | 134 | 14.60  | 24.87  | 123              |
|  | baseline | 3 | 23.64  | 2.17  | 134 | 19.36  | 27.93  | 1234             |
|  | 1 mo     | 3 | 27.11  | 2.19  | 134 | 22.77  | 31.45  | 1234             |

|  |          |   |       |       |     |       |       |           |
|--|----------|---|-------|-------|-----|-------|-------|-----------|
|  | 3 mo     | 3 | 21.20 | 2.25  | 134 | 16.74 | 25.66 | 1234      |
|  | 6 mo     | 3 | 19.40 | 2.40  | 134 | 14.66 | 24.15 | 12        |
|  | 12 mo    | 3 | 21.04 | 2.83  | 134 | 15.44 | 26.64 | 1234      |
|  | baseline | 4 | 30.69 | 1.51  | 134 | 27.71 | 33.67 | 4         |
|  | 1 mo     | 4 | 30.52 | 1.52  | 134 | 27.52 | 33.52 | 34        |
|  | 3 mo     | 4 | 23.65 | 1.53  | 134 | 20.63 | 26.67 | 12        |
|  | 6 mo     | 4 | 20.33 | 1.58  | 134 | 17.21 | 23.45 | 12        |
|  | 12 mo    | 4 | 19.45 | 1.80  | 134 | 15.89 | 23.01 | 12        |
|  | baseline | 1 | 31.95 | 9.43  | 137 | 13.30 | 50.60 | 123       |
|  | 1 mo     | 1 | 40.63 | 9.43  | 137 | 21.99 | 59.28 | 123       |
|  | 3 mo     | 1 | 24.67 | 9.43  | 137 | 6.02  | 43.31 | 123       |
|  | 6 mo     | 1 | 21.77 | 9.43  | 137 | 3.12  | 40.41 | 123       |
|  | 12 mo    | 1 | 21.79 | 11.18 | 137 | -0.33 | 43.90 | 123       |
|  | baseline | 2 | 33.79 | 3.80  | 134 | 26.28 | 41.31 | 123       |
|  | 1 mo     | 2 | 47.41 | 3.80  | 134 | 39.90 | 54.92 | 3         |
|  | 3 mo     | 2 | 26.27 | 3.89  | 134 | 18.58 | 33.95 | 12        |
|  | 6 mo     | 2 | 21.07 | 4.21  | 134 | 12.74 | 29.40 | 1         |
|  | 12 mo    | 2 | 17.63 | 5.06  | 134 | 7.62  | 27.64 | 1         |
|  | baseline | 3 | 30.90 | 4.15  | 134 | 22.70 | 39.11 | 123       |
|  | 1 mo     | 3 | 37.01 | 4.20  | 134 | 28.69 | 45.32 | 123       |
|  | 3 mo     | 3 | 30.58 | 4.26  | 134 | 22.15 | 39.02 | 123       |
|  | 6 mo     | 3 | 19.71 | 4.62  | 134 | 10.56 | 28.85 | 1         |
|  | 12 mo    | 3 | 19.52 | 5.52  | 134 | 8.61  | 30.44 | 1         |
|  | baseline | 4 | 43.11 | 2.89  | 134 | 37.40 | 48.82 | 23        |
|  | 1 mo     | 4 | 43.19 | 2.91  | 134 | 37.45 | 48.94 | 23        |
|  | 3 mo     | 4 | 26.80 | 2.93  | 134 | 21.02 | 32.59 | 1         |
|  | 6 mo     | 4 | 20.05 | 3.03  | 134 | 14.06 | 26.05 | 1         |
|  | 12 mo    | 4 | 19.26 | 3.49  | 134 | 12.36 | 26.15 | 1         |
|  | baseline | 1 | 3.27  | 2.25  | 137 | -1.18 | 7.72  | 12        |
|  | 1 mo     | 1 | 3.44  | 2.25  | 137 | -1.01 | 7.89  | 12        |
|  | 3 mo     | 1 | 2.57  | 2.25  | 137 | -1.88 | 7.02  | 12        |
|  | 6 mo     | 1 | 2.36  | 2.25  | 137 | -2.09 | 6.81  | 12        |
|  | 12 mo    | 1 | 0.98  | 2.69  | 137 | -4.34 | 6.29  | 12        |
|  | baseline | 2 | 6.01  | 0.93  | 134 | 4.17  | 7.84  | 12        |
|  | 1 mo     | 2 | 4.56  | 0.91  | 134 | 2.77  | 6.36  | 12        |
|  | 3 mo     | 2 | 3.88  | 0.93  | 134 | 2.04  | 5.71  | 1         |
|  | 6 mo     | 2 | 2.98  | 1.01  | 134 | 0.98  | 4.97  | 1         |
|  | 12 mo    | 2 | 3.58  | 1.22  | 134 | 1.17  | 6.00  | 12        |
|  | baseline | 3 | 5.60  | 0.99  | 134 | 3.64  | 7.55  | 12        |
|  | 1 mo     | 3 | 3.92  | 1.00  | 134 | 1.94  | 5.91  | 12        |
|  | 3 mo     | 3 | 4.24  | 1.02  | 134 | 2.23  | 6.26  | 12        |
|  | 6 mo     | 3 | 3.04  | 1.11  | 134 | 0.84  | 5.23  | 1         |
|  | 12 mo    | 3 | 4.93  | 1.33  | 134 | 2.30  | 7.56  | 12        |
|  | baseline | 4 | 8.09  | 0.70  | 134 | 6.71  | 9.47  | 2         |
|  | 1 mo     | 4 | 5.59  | 0.69  | 134 | 4.21  | 6.96  | 12        |
|  | 3 mo     | 4 | 4.99  | 0.70  | 134 | 3.61  | 6.38  | 1         |
|  | 6 mo     | 4 | 3.38  | 0.72  | 134 | 1.95  | 4.82  | 1         |
|  | 12 mo    | 4 | 2.46  | 0.84  | 134 | 0.80  | 4.12  | 1         |
|  | baseline | 1 | 1.02  | 0.03  | 137 | 0.96  | 1.09  | 123456789 |
|  | 1 mo     | 1 | 0.99  | 0.03  | 137 | 0.92  | 1.05  | 123456789 |
|  | 3 mo     | 1 | 1.01  | 0.03  | 137 | 0.95  | 1.08  | 123456789 |

|  |          |   |          |         |     |          |          |           |
|--|----------|---|----------|---------|-----|----------|----------|-----------|
|  | 6 mo     | 1 | 0.96     | 0.03    | 137 | 0.90     | 1.03     | 123456789 |
|  | 12 mo    | 1 | 0.98     | 0.04    | 137 | 0.91     | 1.05     | 123456789 |
|  | baseline | 2 | 0.97     | 0.01    | 134 | 0.94     | 1.00     | 345678    |
|  | 1 mo     | 2 | 0.95     | 0.01    | 134 | 0.93     | 0.98     | 23456     |
|  | 3 mo     | 2 | 0.94     | 0.01    | 134 | 0.92     | 0.97     | 23456     |
|  | 6 mo     | 2 | 0.92     | 0.01    | 134 | 0.89     | 0.95     | 12        |
|  | 12 mo    | 2 | 0.89     | 0.02    | 134 | 0.86     | 0.92     | 1         |
|  | baseline | 3 | 1.01     | 0.01    | 134 | 0.98     | 1.04     | 4689      |
|  | 1 mo     | 3 | 0.99     | 0.01    | 134 | 0.96     | 1.02     | 23456789  |
|  | 3 mo     | 3 | 0.98     | 0.01    | 134 | 0.95     | 1.01     | 2345678   |
|  | 6 mo     | 3 | 0.97     | 0.02    | 134 | 0.93     | 1.00     | 12357     |
|  | 12 mo    | 3 | 0.97     | 0.02    | 134 | 0.93     | 1.00     | 12345678  |
|  | baseline | 4 | 1.04     | 0.01    | 134 | 1.02     | 1.06     | 9         |
|  | 1 mo     | 4 | 1.02     | 0.01    | 134 | 1.00     | 1.04     | 78        |
|  | 3 mo     | 4 | 1.00     | 0.01    | 134 | 0.98     | 1.02     | 5678      |
|  | 6 mo     | 4 | 0.98     | 0.01    | 134 | 0.96     | 1.00     | 23456     |
|  | 12 mo    | 4 | 0.96     | 0.01    | 134 | 0.94     | 0.98     | 1234      |
|  | baseline | 1 | 71484.00 | 6339.23 | 136 | 58947.79 | 84020.21 | NA        |
|  | 1 mo     | 1 | 64577.67 | 6339.23 | 136 | 52041.46 | 77113.88 | NA        |
|  | 3 mo     | 1 | 52697.46 | 6445.27 | 136 | 39951.54 | 65443.39 | NA        |
|  | 6 mo     | 1 | 41997.17 | 6339.23 | 136 | 29460.96 | 54533.38 | NA        |
|  | 12 mo    | 1 | 40037.27 | 6601.15 | 136 | 26983.10 | 53091.44 | NA        |
|  | baseline | 2 | 68278.04 | 2558.72 | 133 | 63216.99 | 73339.08 | NA        |
|  | 1 mo     | 2 | 60340.68 | 2552.77 | 133 | 55291.40 | 65389.95 | NA        |
|  | 3 mo     | 2 | 49832.87 | 2565.39 | 133 | 44758.63 | 54907.11 | NA        |
|  | 6 mo     | 2 | 41037.09 | 2614.07 | 133 | 35866.55 | 46207.62 | NA        |
|  | 12 mo    | 2 | 35889.03 | 2751.97 | 133 | 30445.74 | 41332.31 | NA        |
|  | baseline | 3 | 64970.71 | 2797.16 | 133 | 59438.04 | 70503.39 | NA        |
|  | 1 mo     | 3 | 57857.68 | 2788.89 | 133 | 52341.36 | 63373.99 | NA        |
|  | 3 mo     | 3 | 48762.01 | 2805.50 | 133 | 43212.85 | 54311.17 | NA        |
|  | 6 mo     | 3 | 41479.53 | 2859.86 | 133 | 35822.84 | 47136.22 | NA        |
|  | 12 mo    | 3 | 33804.26 | 3004.72 | 133 | 27861.05 | 39747.47 | 12        |
|  | baseline | 4 | 64232.42 | 1962.35 | 133 | 60350.97 | 68113.86 | NA        |
|  | 1 mo     | 4 | 56814.92 | 1962.18 | 133 | 52933.80 | 60696.03 | NA        |
|  | 3 mo     | 4 | 46932.75 | 1964.69 | 133 | 43046.67 | 50818.83 | NA        |
|  | 6 mo     | 4 | 41327.89 | 1977.62 | 133 | 37416.23 | 45239.55 | NA        |
|  | 12 mo    | 4 | 36903.07 | 2050.27 | 133 | 32847.70 | 40958.43 | 135       |
|  | baseline | 1 | 76091.33 | 5020.04 | 136 | 66163.89 | 86018.78 | NA        |
|  | 1 mo     | 1 | 69184.50 | 5020.04 | 136 | 59257.06 | 79111.94 | NA        |
|  | 3 mo     | 1 | 68930.17 | 5020.04 | 136 | 59002.72 | 78857.61 | 1         |
|  | 6 mo     | 1 | 67574.67 | 5020.04 | 136 | 57647.22 | 77502.11 | 1         |
|  | 12 mo    | 1 | 67824.44 | 5077.98 | 136 | 57782.43 | 77866.46 | 1         |
|  | baseline | 2 | 63309.78 | 2022.85 | 133 | 59308.67 | 67310.90 | 1         |
|  | 1 mo     | 2 | 57526.70 | 2021.54 | 133 | 53528.17 | 61525.23 | 1234      |
|  | 3 mo     | 2 | 57225.03 | 2025.89 | 133 | 53217.91 | 61232.16 | 1234      |
|  | 6 mo     | 2 | 57082.43 | 2035.22 | 133 | 53056.85 | 61108.01 | 1234      |
|  | 12 mo    | 2 | 57101.31 | 2066.61 | 133 | 53013.63 | 61188.98 | 1234      |
|  | baseline | 3 | 66221.17 | 2210.35 | 133 | 61849.19 | 70593.15 | 23        |
|  | 1 mo     | 3 | 59867.45 | 2208.53 | 133 | 55499.07 | 64235.83 | 125678    |
|  | 3 mo     | 3 | 59416.80 | 2212.18 | 133 | 55041.19 | 63792.41 | 125678    |
|  | 6 mo     | 3 | 58668.94 | 2224.28 | 133 | 54269.41 | 63068.48 | 125678    |



|                                        |          |   |          |         |     |          |          |          |
|----------------------------------------|----------|---|----------|---------|-----|----------|----------|----------|
|                                        | 12 mo    | 3 | 57440.70 | 2257.20 | 133 | 52976.04 | 61905.36 | 1256     |
|                                        | baseline | 4 | 68246.66 | 1550.55 | 133 | 65179.73 | 71313.59 | 4        |
|                                        | 1 mo     | 4 | 61629.61 | 1549.91 | 133 | 58563.94 | 64695.27 | 123      |
|                                        | 3 mo     | 4 | 61120.43 | 1550.40 | 133 | 58053.80 | 64187.06 | 124      |
|                                        | 6 mo     | 4 | 61066.98 | 1553.92 | 133 | 57993.39 | 64140.57 | 3        |
|                                        | 12 mo    | 4 | 61005.23 | 1570.15 | 133 | 57899.54 | 64110.93 | 4        |
| Physical activity                      | baseline | 1 | 6468.25  | 3996.78 | 137 | -1435.11 | 14371.61 | 123      |
|                                        | 1 mo     | 1 | 2967.34  | 4296.96 | 137 | -5529.61 | 11464.29 | 123      |
|                                        | 3 mo     | 1 | 13212.83 | 3996.78 | 137 | 5309.48  | 21116.19 | 123      |
|                                        | 6 mo     | 1 | 9390.40  | 4296.96 | 137 | 893.45   | 17887.35 | 123      |
|                                        | 12 mo    | 1 | 12851.44 | 4712.62 | 137 | 3532.55  | 22170.33 | 123      |
|                                        | baseline | 2 | 9713.04  | 1627.26 | 134 | 6494.61  | 12931.47 | 123      |
|                                        | 1 mo     | 2 | 7852.02  | 1627.24 | 134 | 4633.62  | 11070.42 | 12       |
|                                        | 3 mo     | 2 | 12073.64 | 1664.84 | 134 | 8780.88  | 15366.40 | 123      |
|                                        | 6 mo     | 2 | 13114.97 | 1777.28 | 134 | 9599.82  | 16630.12 | 123      |
|                                        | 12 mo    | 2 | 16769.66 | 2125.48 | 134 | 12565.83 | 20973.49 | 3        |
|                                        | baseline | 3 | 8229.02  | 1758.35 | 134 | 4751.31  | 11706.72 | 123      |
|                                        | 1 mo     | 3 | 7410.02  | 1758.35 | 134 | 3932.31  | 10887.72 | 123      |
|                                        | 3 mo     | 3 | 10076.13 | 1806.43 | 134 | 6503.33  | 13648.93 | 123      |
|                                        | 6 mo     | 3 | 10642.96 | 1987.61 | 134 | 6711.80  | 14574.11 | 123      |
|                                        | 12 mo    | 3 | 15904.37 | 2317.03 | 134 | 11321.69 | 20487.05 | 23       |
|                                        | baseline | 4 | 9308.51  | 1240.60 | 134 | 6854.82  | 11762.19 | 123      |
|                                        | 1 mo     | 4 | 5905.48  | 1274.00 | 134 | 3385.73  | 8425.24  | 1        |
|                                        | 3 mo     | 4 | 10977.83 | 1264.71 | 134 | 8476.45  | 13479.22 | 123      |
|                                        | 6 mo     | 4 | 9821.70  | 1301.46 | 134 | 7247.64  | 12395.76 | 123      |
|                                        | 12 mo    | 4 | 11520.95 | 1501.20 | 134 | 8551.84  | 14490.06 | 123      |
| Mean insulin concentration during OGTT | baseline | 1 | 111.50   | 20.17   | 137 | 71.61    | 151.39   | 1        |
|                                        | 1 mo     | 1 | 22.21    | 20.17   | 137 | -17.68   | 62.11    | 2        |
|                                        | 3 mo     | 1 | 97.97    | 20.17   | 137 | 58.08    | 137.86   | 34       |
|                                        | 6 mo     | 1 | 65.32    | 20.17   | 137 | 25.43    | 105.21   | 45       |
|                                        | 12 mo    | 1 | 53.74    | 23.30   | 137 | 7.67     | 99.82    | 3        |
|                                        | baseline | 2 | 95.62    | 8.12    | 134 | 79.55    | 111.68   | 70A      |
|                                        | 1 mo     | 2 | 18.97    | 8.12    | 134 | 2.91     | 35.04    | 12       |
|                                        | 3 mo     | 2 | 54.57    | 8.28    | 134 | 38.19    | 70.94    | 345689   |
|                                        | 6 mo     | 2 | 47.79    | 8.86    | 134 | 30.26    | 65.31    | 12345689 |
|                                        | 12 mo    | 2 | 37.41    | 10.40   | 134 | 16.84    | 57.99    | 123458   |
|                                        | baseline | 3 | 130.69   | 8.87    | 134 | 113.14   | 148.24   | A        |
|                                        | 1 mo     | 3 | 20.60    | 8.97    | 134 | 2.85     | 38.35    | 13       |
|                                        | 3 mo     | 3 | 84.29    | 9.19    | 134 | 66.10    | 102.47   | 567890   |
|                                        | 6 mo     | 3 | 64.41    | 9.73    | 134 | 45.17    | 83.65    | 24567890 |
|                                        | 12 mo    | 3 | 72.26    | 11.65   | 134 | 49.22    | 95.29    | 567890   |
|                                        | baseline | 4 | 131.51   | 6.18    | 134 | 119.30   | 143.73   | A        |
|                                        | 1 mo     | 4 | 23.53    | 6.21    | 134 | 11.25    | 35.81    | 1234     |
|                                        | 3 mo     | 4 | 85.07    | 6.24    | 134 | 72.73    | 97.42    | 6790     |
|                                        | 6 mo     | 4 | 81.30    | 6.47    | 134 | 68.50    | 94.10    | 567890   |
|                                        | 12 mo    | 4 | 64.00    | 7.32    | 134 | 49.53    | 78.48    | 567890   |
| Mean glucose concentration during OGTT | baseline | 1 | 114.04   | 10.02   | 137 | 94.23    | 133.85   | 123456   |
|                                        | 1 mo     | 1 | 98.33    | 10.02   | 137 | 78.53    | 118.14   | 12345    |
|                                        | 3 mo     | 1 | 122.13   | 10.02   | 137 | 102.32   | 141.93   | 123456   |
|                                        | 6 mo     | 1 | 116.63   | 10.02   | 137 | 96.82    | 136.43   | 123456   |
|                                        | 12 mo    | 1 | 111.13   | 11.63   | 137 | 88.14    | 134.13   | 123456   |

|               |          |   |        |       |     |        |        |          |
|---------------|----------|---|--------|-------|-----|--------|--------|----------|
|               | baseline | 2 | 136.18 | 4.03  | 134 | 128.20 | 144.16 | 56       |
|               | 1 mo     | 2 | 101.35 | 4.03  | 134 | 93.37  | 109.33 | 1        |
|               | 3 mo     | 2 | 114.71 | 4.11  | 134 | 106.57 | 122.85 | 1234     |
|               | 6 mo     | 2 | 110.30 | 4.41  | 134 | 101.57 | 119.03 | 1234     |
|               | 12 mo    | 2 | 108.97 | 5.21  | 134 | 98.67  | 119.27 | 1234     |
|               | baseline | 3 | 163.71 | 4.41  | 134 | 154.99 | 172.43 | 7        |
|               | 1 mo     | 3 | 108.52 | 4.46  | 134 | 99.71  | 117.34 | 13       |
|               | 3 mo     | 3 | 126.67 | 4.51  | 134 | 117.74 | 135.60 | 2456     |
|               | 6 mo     | 3 | 123.81 | 4.85  | 134 | 114.22 | 133.39 | 123456   |
|               | 12 mo    | 3 | 119.40 | 5.68  | 134 | 108.17 | 130.63 | 123456   |
|               | baseline | 4 | 199.03 | 3.07  | 134 | 192.96 | 205.09 | 8        |
|               | 1 mo     | 4 | 114.64 | 3.08  | 134 | 108.54 | 120.74 | 12       |
|               | 3 mo     | 4 | 139.51 | 3.10  | 134 | 133.37 | 145.64 | 6        |
|               | 6 mo     | 4 | 136.22 | 3.20  | 134 | 129.89 | 142.54 | 56       |
|               | 12 mo    | 4 | 128.81 | 3.62  | 134 | 121.65 | 135.97 | 3456     |
| Matsuda index | baseline | 1 | 1.62   | 1.43  | 137 | -1.20  | 4.44   | 12345    |
|               | 3 mo     | 1 | 3.14   | 1.43  | 137 | 0.32   | 5.96   | 12345678 |
|               | 6 mo     | 1 | 5.90   | 1.43  | 137 | 3.08   | 8.72   | 12345678 |
|               | 12 mo    | 1 | 8.51   | 1.67  | 137 | 5.21   | 11.81  | 678      |
|               | baseline | 2 | 2.15   | 0.57  | 134 | 1.01   | 3.28   | 12       |
|               | 3 mo     | 2 | 6.48   | 0.59  | 134 | 5.32   | 7.64   | 4578     |
|               | 6 mo     | 2 | 6.82   | 0.63  | 134 | 5.57   | 8.07   | 58       |
|               | 12 mo    | 2 | 7.20   | 0.75  | 134 | 5.71   | 8.68   | 58       |
|               | baseline | 3 | 1.40   | 0.63  | 134 | 0.16   | 2.64   | 12       |
|               | 3 mo     | 3 | 3.63   | 0.65  | 134 | 2.34   | 4.92   | 123467   |
|               | 6 mo     | 3 | 5.83   | 0.69  | 134 | 4.46   | 7.20   | 345678   |
|               | 12 mo    | 3 | 4.35   | 0.84  | 134 | 2.68   | 6.02   | 12345678 |
|               | baseline | 4 | 1.13   | 0.44  | 134 | 0.26   | 1.99   | 1        |
|               | 3 mo     | 4 | 3.22   | 0.44  | 134 | 2.34   | 4.09   | 236      |
|               | 6 mo     | 4 | 3.58   | 0.46  | 134 | 2.67   | 4.49   | 236      |
|               | 12 mo    | 4 | 5.10   | 0.53  | 134 | 4.06   | 6.14   | 345678   |
| Glucose AUC   | baseline | 1 | 231.25 | 24.19 | 137 | 183.42 | 279.08 | 123      |
|               | 3 mo     | 1 | 266.08 | 25.83 | 137 | 215.00 | 317.16 | 1234     |
|               | 6 mo     | 1 | 280.86 | 30.89 | 137 | 219.77 | 341.95 | 1234     |
|               | 12 mo    | 1 | 265.11 | 35.90 | 137 | 194.12 | 336.10 | 1234     |
|               | baseline | 2 | 285.66 | 9.74  | 134 | 266.39 | 304.92 | 23       |
|               | 3 mo     | 2 | 267.08 | 11.71 | 134 | 243.92 | 290.23 | 123      |
|               | 6 mo     | 2 | 234.79 | 12.12 | 134 | 210.82 | 258.77 | 1        |
|               | 12 mo    | 2 | 250.33 | 15.24 | 134 | 220.19 | 280.46 | 12       |
|               | baseline | 3 | 353.06 | 10.64 | 134 | 332.01 | 374.10 | 4        |
|               | 3 mo     | 3 | 273.83 | 11.45 | 134 | 251.17 | 296.48 | 123      |
|               | 6 mo     | 3 | 279.21 | 12.58 | 134 | 254.32 | 304.10 | 123      |
|               | 12 mo    | 3 | 259.84 | 14.01 | 134 | 232.13 | 287.56 | 123      |
|               | baseline | 4 | 427.92 | 7.41  | 134 | 413.27 | 442.57 | 5        |
|               | 3 mo     | 4 | 312.29 | 8.10  | 134 | 296.27 | 328.30 | 34       |
|               | 6 mo     | 4 | 309.18 | 8.22  | 134 | 292.93 | 325.44 | 234      |
|               | 12 mo    | 4 | 308.78 | 9.98  | 134 | 289.04 | 328.53 | 234      |
| Insulin AUC   | baseline | 1 | 247.82 | 51.83 | 136 | 145.33 | 350.32 | 1234     |
|               | 3 mo     | 1 | 278.52 | 55.10 | 136 | 169.56 | 387.48 | 1234     |
|               | 6 mo     | 1 | 295.67 | 65.11 | 136 | 166.90 | 424.43 | 1234     |
|               | 12 mo    | 1 | 223.20 | 75.06 | 136 | 74.76  | 371.64 | 1234     |

|          |   |        |       |     |        |        |      |
|----------|---|--------|-------|-----|--------|--------|------|
| baseline | 2 | 227.33 | 21.16 | 133 | 185.48 | 269.18 | 1234 |
| 3 mo     | 2 | 183.57 | 24.86 | 133 | 134.40 | 232.75 | 1    |
| 6 mo     | 2 | 160.14 | 26.14 | 133 | 108.43 | 211.84 | 1    |
| 12 mo    | 2 | 146.63 | 31.89 | 133 | 83.55  | 209.72 | 1    |
| baseline | 3 | 309.44 | 22.80 | 133 | 264.34 | 354.54 | 34   |
| 3 mo     | 3 | 216.19 | 24.41 | 133 | 167.90 | 264.47 | 12   |
| 6 mo     | 3 | 183.46 | 27.10 | 133 | 129.86 | 237.07 | 1    |
| 12 mo    | 3 | 181.85 | 29.47 | 133 | 123.56 | 240.15 | 12   |
| baseline | 4 | 298.49 | 15.87 | 133 | 267.10 | 329.88 | 24   |
| 3 mo     | 4 | 230.45 | 17.23 | 133 | 196.37 | 264.54 | 13   |
| 6 mo     | 4 | 223.94 | 17.47 | 133 | 189.39 | 258.49 | 13   |
| 12 mo    | 4 | 207.92 | 20.96 | 133 | 166.46 | 249.37 | 13   |

**Table S6.** Factor level tests on generalized linear mixed models comparing time points for OGTT-specific cross sections with predictors time + OGTT cluster + time  $\times$  OGTT cluster, controlling for age, sex, and smoking status. Mean refers to model-adjusted mean; SE for standard error; df for degrees of freedom; LCL for the lower 95% confidence limit; UCL for the upper 95% confidence limit; CLD for compact letter display. Times-cluster combinations with different CLDs within a particular parameter indicates that they are different from each other. NAs represent failures in model convergence, and we do not attempt to speculate about post-hoc significances of the time-by-OGTT cluster factor level combinations for these levels.

|                     | PC  | cluster | LS mean | SE    | df | LCL    | UCL    | CLD |
|---------------------|-----|---------|---------|-------|----|--------|--------|-----|
| Glucose homeostasis | PC1 | 4       | -0.389  | 0.341 | 80 | -1.068 | 0.290  | 1   |
|                     |     | 3       | -0.007  | 0.533 | 80 | -1.068 | 1.054  | 1   |
|                     |     | 2       | 0.475   | 0.519 | 80 | -0.557 | 1.508  | 1   |
|                     |     | 1       | 2.735   | 1.306 | 80 | 0.136  | 5.333  | 1   |
|                     | PC2 | 4       | -0.579  | 0.216 | 80 | -1.009 | -0.149 | 1   |
|                     |     | 3       | 0.449   | 0.338 | 80 | -0.223 | 1.121  | 12  |
|                     |     | 2       | 0.570   | 0.329 | 80 | -0.084 | 1.224  | 2   |
|                     |     | 1       | 2.181   | 0.827 | 80 | 0.535  | 3.828  | 2   |
| Anthropometric      | PC1 | 1       | -0.935  | 1.302 | 76 | -3.527 | 1.657  | 1   |
|                     |     | 2       | -0.666  | 0.631 | 76 | -1.923 | 0.591  | 1   |
|                     |     | 4       | 0.062   | 0.407 | 76 | -0.748 | 0.871  | 1   |
|                     |     | 3       | 0.696   | 0.614 | 76 | -0.526 | 1.918  | 1   |
|                     | PC2 | 3       | -0.250  | 0.332 | 76 | -0.911 | 0.412  | 1   |
|                     |     | 4       | 0.039   | 0.220 | 76 | -0.399 | 0.478  | 1   |
|                     |     | 2       | 0.089   | 0.342 | 76 | -0.591 | 0.770  | 1   |
|                     |     | 1       | 0.340   | 0.704 | 76 | -1.063 | 1.743  | 1   |

**Table S7.** Post-hoc tests on generalized linear mixed models comparing principal component scores as “principal responses” to bariatric surgery among OGTT clusters controlling for age, sex, and smoking status. PC1 refers to principle component 1; PC2 refers to principle component 2. Cluster refers to OGTT cluster. LS mean refers to least square mean; SE for standard error; df for degrees of freedom; LCL for the lower 95% confidence limit; UCL for the upper 95% confidence limit; CLD for compact letter display. Clusters with different CLDs within a particular PC indicates that the response in those clusters are significantly different from each other.

| <b>model</b>                     | <b>FU</b> | <b>TPR</b> | <b>FPR</b> | <b>AUC</b> |
|----------------------------------|-----------|------------|------------|------------|
| Model A:<br>Hx                   | 1 mo      | 0.433      | 0.163      | 0.699      |
|                                  | 3 mo      | 0.539      | 0.099      | 0.720      |
|                                  | 6 mo      | 0.234      | 0.073      | 0.740      |
|                                  | 12 mo     | 0.488      | 0.301      | 0.609      |
| Model B:<br>Hx+OGTT              | 1 mo      | 0.500      | 0.059      | 0.897      |
|                                  | 3 mo      | 0.571      | 0.071      | 0.908      |
|                                  | 6 mo      | 0.333      | 0.077      | 0.885      |
|                                  | 12 mo     | 0.800      | 0.222      | 0.844      |
| Model C:<br>Hx+OGTT+CRP+HbA1c    | 1 mo      | 1.000      | 0.000      | 1.000      |
|                                  | 3 mo      | 0.667      | 0.143      | 0.917      |
|                                  | 6 mo      | 0.600      | 0.154      | 0.892      |
|                                  | 12 mo     | 1.000      | 0.000      | 1.000      |
| Model D:<br>Hx+OGTT+CRP+HbA1c+Rx | 1 mo      | 1.000      | 0.000      | 1.000      |
|                                  | 3 mo      | 1.000      | 0.000      | 1.000      |
|                                  | 6 mo      | 1.000      | 0.000      | 1.000      |
|                                  | 12 mo     | 1.000      | 0.000      | 1.000      |

**Table S8.** Nested model performance predicting diabetes improvement and remission from baseline parameters. The models contained the following baseline terms: Model A with patient history (Hx) variables (BMI, number of past years smoking, and years since diabetes diagnosis); Model B with patient history variables and OGTT cluster; Model C with patient history variables, OGTT cluster, C reactive protein concentration, and HbA1c; and Model D with patient history variables, OGTT cluster, C reactive protein concentration, HbA1c, and the number of medications prescribed to a patient one week prior to surgery considering only statins, metformin, insulin, gliptins, sulfonyl ureas, and glifozins. TPR is for true positive rate; FPR is for false positive rate, and AUC is for area under the curve.

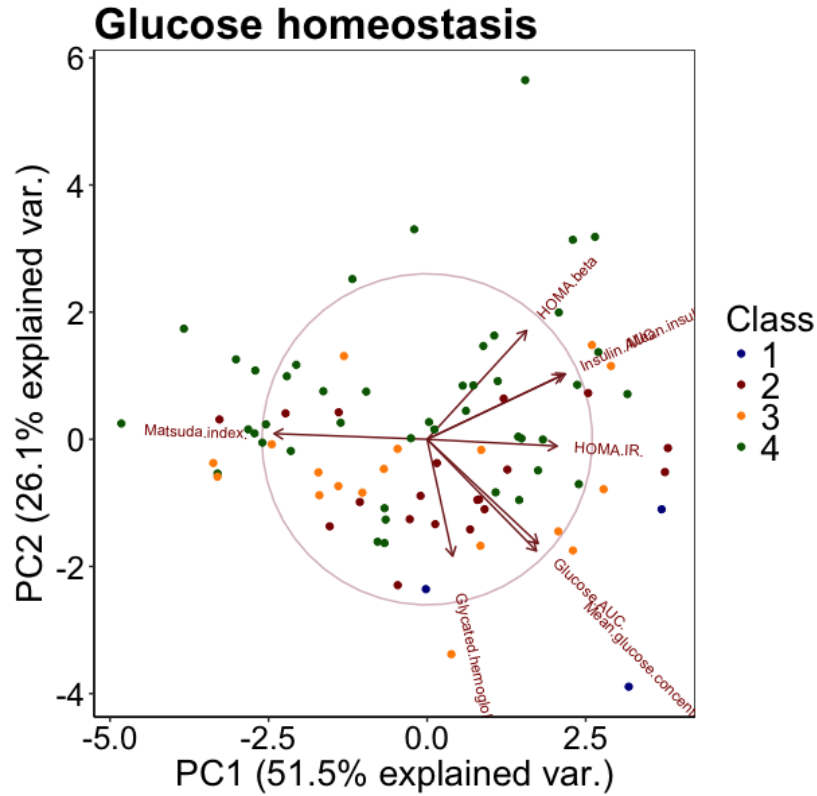

**Figure S1.** Biplot from principal components analysis of glucose homeostasis parameters (Table S1) with loadings plotted as arrows for each parameter and individual patients plotted as scores along PC1 and PC2. PC1 refers to the first principal component and PC2 refers to the second principal component; Cluster refers to OGTT cluster.

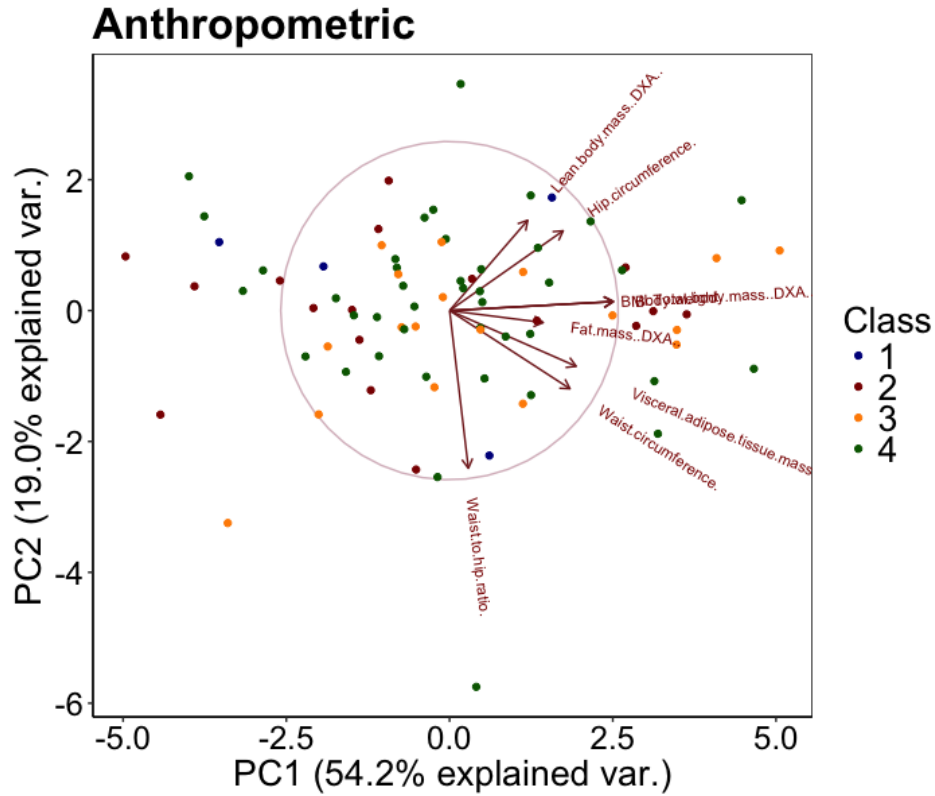

**Figure S2.** Biplot from principal components analysis of anthropometric parameters (Table S1) with loadings plotted as arrows for each parameter and individual patients plotted as scores along PC1 and PC2. PC1 refers to the first principal component and PC2 refers to the second principal component; Cluster refers to OGTT cluster.

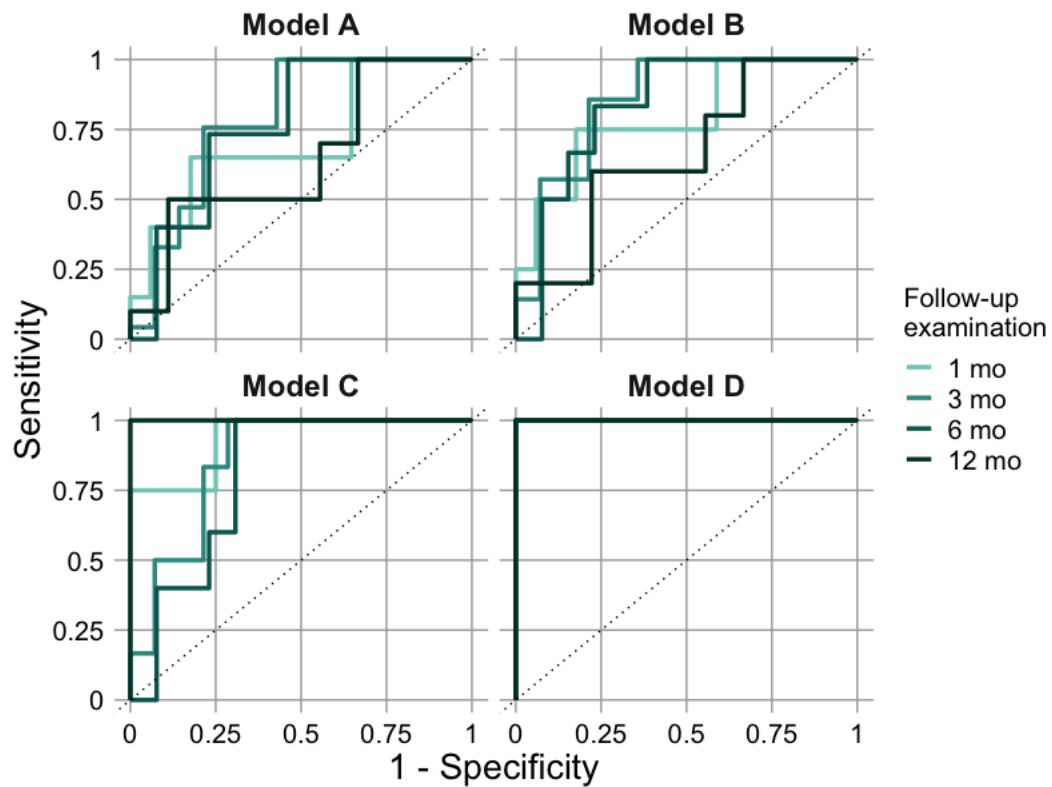

**Figure S3.** Receiver operating characteristic curves from multinomial regression predicting diabetes remission. These were fit sequentially to each follow-up exam visit when a patient was assessed for diabetes remission. The models contained the following baseline terms: Model A with patient history (Hx) variables (BMI, number of past years smoking, and years since diabetes diagnosis); Model B with patient history variables and OGTT cluster; Model C with patient history variables, OGTT cluster, C reactive protein concentration, and HbA1c; and Model D with patient history variables, OGTT cluster, C reactive protein concentration, HbA1c, and the number of medications prescribed to a patient one week prior to surgery considering only statins, metformin, insulin, gliptins, sulfonyl ureas, and glifozins.
